# Supplementary material for: Incidence and regression of metabolic syndrome in a representative sample of the Spanish population: results of the cohort di@bet.es study
Source: PubMed Central journal article supplement — BMJ Open Diabetes Res Care. 2020 Oct 13;8(1):e001715. doi: 10.1136/bmjdrc-2020-001715 (PMC7554469; doi:10.1136/bmjdrc-2020-001715), 2020-10-13
Supplement: bmjdrc-2020-001715supp001.pdf [file bmjdrc-2020-001715supp001.pdf]

Supplementary table 1. Multivariate analysis. Incidence rate (A) and regression rate (B) adjusted by age, gender, marital status, educational level and number of components of Metabolic Syndrome (Model 1) and adding the basic health zone (Model 2)

|                                     | Model 1              |        |            | Model 2 |            |        |
|-------------------------------------|----------------------|--------|------------|---------|------------|--------|
|                                     | Exp(b)               | 95% CI | p          | Exp(b)  | 95% CI     | P      |
| <b>A. Incidence</b>                 |                      |        |            |         |            |        |
| <b>Age</b>                          | 18-45                | 1      | <0.001     | 1       |            | <0.001 |
|                                     | 46-60                | 2.11   | 1.47-3.03  | 2.18    | 1.53-3.10  |        |
|                                     | 61-75                | 3.54   | 2.30-5.47  | 3.27    | 2.16-4.96  |        |
|                                     | >=76                 | 3.36   | 1.25-9.03  | 3.38    | 1.29-8.86  |        |
| <b>Gender</b>                       | Women                | 1      | <0.001     | 1       |            | <0.001 |
|                                     | Men                  | 2.44   | 1.77-3.35  | 2.25    | 1.65-3.05  |        |
| <b>Marital status</b>               | Others               | 1      | 0.164      | 1       |            | 0.275  |
|                                     | Married / cohabiting | 1.30   | 0.90-1.89  | 1.22    | 0.85-1.76  |        |
| <b>Educational Level</b>            | University degree    | 1      | 0.004      | 1       |            | 0.004  |
|                                     | No university degree | 1.93   | 1.24-3.01  | 1.87    | 1.22-2.89  |        |
| <b>Number of components of MetS</b> | 0                    | 1      | <0.001     | 1       |            | <0.001 |
|                                     | 1                    | 3.14   | 1.76-5.63  | 2.93    | 1.65-5.23  |        |
|                                     | 2                    | 10.63  | 6.04-18.68 | 9.03    | 5.19-15.72 |        |
| <b>B. Regression</b>                |                      |        |            |         |            |        |
| <b>Age</b>                          | >=76                 | 1      | 0.022      | 1       |            | 0.028  |
|                                     | 18-45                | 1.93   | 0.79-4.74  | 1.86    | 0.77-4.50  |        |
|                                     | 46-60                | 1.17   | 0.49-2.79  | 1.16    | 0.49-2.76  |        |
|                                     | 61-75                | 0.88   | 0.37-2.09  | 0.87    | 0.37-2.06  |        |

|                                     |                      |      |            |        |      |            |        |
|-------------------------------------|----------------------|------|------------|--------|------|------------|--------|
| <b>Gender</b>                       | Men                  | 1    |            | <0.001 | 1    |            | <0.001 |
|                                     | Women                | 2.16 | 1.45-3.22  |        | 2.09 | 1.42-3.08  |        |
| <b>Marital status</b>               | Married / cohabiting | 1    |            | 0.598  | 1    |            | 0.674  |
|                                     | Others               | 1.14 | 0.70-1.87  |        | 1.11 | 0.68-1.81  |        |
| <b>Educational Level</b>            | No university degree | 1    |            | 0.377  | 1    |            | 0.578  |
|                                     | University degree    | 1.34 | 0.70-2.56  |        | 1.20 | 0.64-2.25  |        |
| <b>Number of components of MetS</b> | 5                    | 1    |            | <0.001 | 1    |            | <0.001 |
|                                     | 4                    | 2.46 | 0.96-6.61  |        | 2.46 | 0.92-6.59  |        |
|                                     | 3                    | 6.41 | 2.50-16.42 |        | 6.20 | 2.43-15.82 |        |
